1 **The genetic and physical interactomes of the *Saccharomyces cerevisiae* Hrq1 helicase**

2

3 Cody M. Rogers<sup>\*1</sup>, Elsbeth Sanders<sup>\*</sup>, Phoebe A. Nguyen<sup>\*</sup>, Whitney Smith-Kinnaman<sup>†</sup>, Amber L.  
4 Mosley<sup>†</sup>, and Matthew L. Bochman<sup>\*</sup>

5

6 <sup>\*</sup> Molecular and Cellular Biochemistry Department, Indiana University, Bloomington, IN 47405

7 <sup>†</sup> Department of Biochemistry and Molecular Biology, Indiana University School of Medicine,  
8 Indianapolis, IN 46202

---

<sup>1</sup> Current address: Cody M. Rogers, Department of Biochemistry and Structural Biology, University of Texas Health Science Center at San Antonio, San Antonio, TX 78229

9 **Running title:** The Hrq1 interactome

10

11 **Key words:** DNA helicase, RecQ, Hrq1, *Saccharomyces cerevisiae*, transcription

12

13 **Corresponding author:** Matthew L. Bochman; 212 S. Hawthorne Dr., Simon Hall MSB1 room

14 405B, Bloomington, IN 47405; 812-856-2095; [bochman@indiana.edu](mailto:bochman@indiana.edu)

15  
16  
17  
18  
19  
20  
21  
22  
23  
24  
25  
26  
27  
28  
29  
30  
31  
32  
33  
34

## ABSTRACT

The human genome encodes five RecQ helicases (RECQL1, BLM, WRN, RECQL4, and RECQL5) that participate in various processes underpinning genomic stability. Of these enzymes, the disease-associated RECQL4 is comparatively understudied due to a variety of technical challenges. However, *Saccharomyces cerevisiae* encodes a functional homolog of RECQL4 called Hrq1, which is more amenable to experimentation and has recently been shown to be involved in DNA inter-strand crosslink (ICL) repair and telomere maintenance. To expand our understanding of Hrq1 and the RecQ4 subfamily of helicases in general, we took a multi-omics approach to define the Hrq1 interactome in yeast. Using synthetic genetic array analysis, we found that mutations of genes involved in processes such as DNA repair, chromosome segregation, and transcription synthetically interact with deletion of *HRQ1* and the catalytically inactive *hrq1-K318A* allele. Pull-down of tagged Hrq1 and mass spectrometry identification of interacting partners similarly underscored links to these processes and others. Focusing on transcription, we found that *hrq1* mutant cells are sensitive to caffeine and that mutation of *HRQ1* alters the expression levels of hundreds of genes. In the case of *hrq1-K318A*, several of the most highly upregulated genes encode proteins of unknown function whose expression levels are also increased by DNA ICL damage. Together, our results suggest a heretofore unrecognized role for Hrq1 in transcription, as well as novel members of the Hrq1 ICL repair pathway. These data expand our understanding of RecQ4 subfamily helicase biology and help to explain why mutations in human RECQL4 cause diseases of genomic instability.

35  
36  
37  
38  
39  
40  
41  
42  
43  
44  
45  
46  
47  
48  
49  
50  
51  
52  
53  
54  
55  
56

## INTRODUCTION

A multitude of cellular processes are necessary to ensure the maintenance of genome integrity, including high fidelity DNA replication, recombination and repair, telomere maintenance, and transcription. Among the proteins that are involved, DNA helicases represent one of only a few enzyme classes that are vital to all of these processes (BOCHMAN 2014). Helicases are enzymes that use the power of ATP hydrolysis to drive conformational changes that enable translocation along DNA and unwinding of DNA base pairs (ABDELHALEEM 2010; BROSH AND MATSON 2020). Because these enzymes are involved in so many critical functions *in vivo*, it is unsurprising that mutations in genes encoding helicases are causative of or linked to numerous diseases of genomic instability such as cancer and aging (MONNAT 2010; SUHASINI AND BROSH 2013; UCHIUMI *et al.* 2015).

Despite their prominent roles in maintaining genome integrity however, we often lack a detailed understanding of why a particular mutation in a helicase is associated with a pathological disorder. In other words, what cellular processes are impacted that eventually precipitate a disease state when a helicase is mutated? Part of the difficulty in answering this question is that many helicases are multi-functional, and a defect in any one of a number of functions could cause genomic instability (HICKSON 2003). Another issue is that helicases are numerous, with > 100 predicted to be encoded by typical eukaryotic genomes (EKI 2010), and many helicases share partially redundant or backup roles, which complicates identification of phenotypes without thorough genomic or proteomic approaches.

57 One such under-studied and disease-linked helicase is the human RECQL4 protein. Dozens of  
58 mutant alleles of *RECQL4* cause three different diseases (Baller-Gerold syndrome (VAN  
59 MALDERGEM *et al.* 1993), RAPADILINO (VARGAS *et al.* 1992), and Rothmund-Thomson syndrome  
60 (LIU 2010)) characterized by a predisposition to cancers, but it is unclear why these mutations  
61 cause disease. RECQL4 is difficult to study *in vivo* because it is an evolutionary chimera between  
62 a RecQ family helicase and Sld2 (CAPP *et al.* 2010), an essential DNA replication initiation factor  
63 in lower eukaryotes (KAMIMURA *et al.* 1998). Helicase activity by RECQL4 is not needed for DNA  
64 replication, but pleiotropic defects in replication hamper the analysis of the roles of the helicase  
65 domain when studying *recql4* mutants. Similarly, RECQL4 is difficult to study *in vitro* because  
66 the protein is large (~135 kDa) with a natively disordered N-terminus (KELLER *et al.* 2014),  
67 making the generation of recombinant protein for biochemistry arduous (MACRIS *et al.* 2006;  
68 BOCHMAN *et al.* 2014). Thus, although RECQL4 is reported to be involved in telomere  
69 maintenance (GHOSH *et al.* 2011) and DNA inter-strand crosslink (ICL) repair (JIN *et al.* 2008), its  
70 mechanism of action in these pathways is unknown.

71

72 Recently, we established the *Saccharomyces cerevisiae* Hrq1 helicase as a functional homolog  
73 of the helicase portion of RECQL4, showing that it too is linked to telomere maintenance and  
74 ICL repair (BOCHMAN *et al.* 2014; ROGERS *et al.* 2017; ROGERS *et al.* 2020). However, because Sld2  
75 is a separate protein in *S. cerevisiae* and recombinant Hrq1 is more amenable to biochemistry,  
76 we have been able to delve into the molecular details of Hrq1 in the maintenance of genome  
77 integrity. For instance, Hrq1 synergizes with the helicase Pif1 to regulate telomerase activity,  
78 likely establishing telomere length homeostasis *in vivo* (NICKENS *et al.* 2018). In ICL repair, Hrq1

79 stimulates the translesional nuclease activity of Pso2 to aid in remove of the ICL (ROGERS *et al.*  
80 2020). During the course of these investigations, we have also found that alleles of *HRQ1*  
81 genetically interact with mutations in the gene encoding the other RecQ family helicase in *S.*  
82 *cerevisiae*, *SGS1* (BOCHMAN *et al.* 2014), and that Hrq1 may be involved in the maintenance of  
83 DNA motifs capable of forming G-quadruplex (G4) structures (ROGERS *et al.* 2017). These facts  
84 are mirrored by the interaction of RECQL4 with the human Sgs1 homolog BLM (SINGH *et al.*  
85 2012) and the ability of RECQL4 to bind to and unwind G4 DNA (KELLER *et al.* 2014).

86  
87 To gain a more comprehensive understanding of the roles of RecQ4 subfamily helicases in  
88 genome integrity, we sought to define the Hrq1 interactome in yeast. Here, we performed  
89 synthetic genetic array (SGA) analysis of *hrq1Δ* and *hrq1-K318A* (catalytically inactive mutant)  
90 cells using the yeast deletion collection and the temperature-sensitive (TS) collection. Hundreds  
91 of significant positive and negative interactions were uncovered, with gene ontology (GO) term  
92 enrichment for processes such as transcription and rRNA processing in addition to expected  
93 functions such as DNA repair. Mass spectrometry (MS) analysis of proteins that physically  
94 interact with Hrq1 returned similar results. Our initial characterization of the link between Hrq1  
95 and transcription revealed that *hrq1* mutant cells are sensitive to the transcription stressor  
96 caffeine and that the *hrq1Δ* and *hrq1-K318A* mutations affect the transcription of hundreds of  
97 genes, many of which are known or hypothesized to be related to transcription, DNA ICL repair,  
98 and the cytoskeleton.

99

100

101  
102  
103  
104  
105  
106  
107  
108  
109  
110  
111  
112  
113  
114  
115  
116  
117  
118  
119  
120  
121

## MATERIALS AND METHODS

### Strain construction

The *HRQ1* gene was deleted in Y8205 (Table 1) by transforming in a NatMX cassette that was PCR-amplified from plasmid pAC372 (a gift from Amy Caudy) using oligonucleotides MB525 and MB526 (Table S1). The deletion was verified by PCR analysis using genomic DNA and oligonucleotides that anneal to regions up- and downstream of the *HRQ1* locus (MB527 and MB528). The confirmed *hrq1* $\Delta$  strain was named MBY639. The *hrq1-K318A* allele was introduced into the Y8205 background in a similar manner. First, an *hrq1-K318A(NatMX)* cassette was PCR-amplified from the genomic DNA of strain MBY346 (BOCHMAN *et al.* 2014) using oligonucleotides MB527 and MB528 and transformed into Y8205. Then, genomic DNA was prepared from transformants and used for PCR analyses of the *HRQ1* locus with the same oligonucleotide set to confirm insertion of the NatMX marker. Finally, PCR products of the expected size for *hrq1-K318A(NatMX)* were sequenced using oligonucleotide MB932 to confirm the presence of the K318A mutation. The verified *hrq1-K318A* strain was named MBY644. Hrq1 was tagged with a 3xFLAG epitope in the YPH499 genetic background by transformation of a 3xFLAG(His3MX6) cassette that was PCR-amplified from the pFA6a-3xFLAG-His3MX6 plasmid (FUNAKOSHI AND HOCHSTRASSER 2009) using oligonucleotides MB1028 and MB1029. Proper integration was assessed by PCR and sequencing as described above for *hrq1-K318A(NatMX)*. The confirmed Hrq1-3xFLAG strain was named MBY520.

## 122 **SGA analysis**

123 SGA analysis of the *hrq1Δ* and *hrq1-K318A* alleles was performed at the University of Toronto  
124 using previously described methods (TONG *et al.* 2001; TONG *et al.* 2004). The *hrq1* mutants were  
125 crossed to both the *S. cerevisiae* single-gene deletion collection (GIAEVER AND NISLOW 2014) and  
126 the TS alleles collection (KOFOED *et al.* 2015) to generate double mutants for analysis.

127 Quantitative scoring of the genetic interactions was based on colony size. The SGA score  
128 measures the extent to which a double mutant colony size deviates from the colony size  
129 expected from combining two mutations together. The data include both negative (putative  
130 synthetic sick/lethal) and positive interactions (potential epistatic or suppression interactions)  
131 involving *hrq1Δ* and *hrq1-K318A*. The magnitude of the SGA score is indicative of the strength  
132 of the interaction. Based on statistical analysis, it was determined that a default cutoff for a  
133 significant genetic interaction is  $p < 0.05$  and SGA score  $> |0.08|$ . It should be noted that only  
134 top-scoring interactions were confirmed by remaking and reanalyzing the double mutants by  
135 hand.

136

## 137 **Confirmation of top SGA hits**

138 The top five positive and negative interactors with *hrq1Δ* and *hrq1-K318A* from the single-gene  
139 deletion and TS arrays were reanalyzed by hand to confirm their phenotypes. Briefly, the SGA  
140 query strains MBY639 and MBY644 (Nat<sup>R</sup>) were mated to *MATa* tester strains from the arrays  
141 (Kan<sup>R</sup>), sporulated, and then analyzed by random spore analysis (LICHTEN 2014) and spot dilution



142 growth assays of Nat<sup>R</sup> Kan<sup>R</sup> spore clones compared to the parental single-mutant strains and  
143 wild-type.

144

#### 145 **Hrq1-3xFLAG affinity pulldown**

146 To immunoprecipitate Hrq1-3xFLAG and its associated proteins, strain MBY520 was grown to  
147 an optical density at 600 nm (OD<sub>600</sub>) of ~1.5 in YPD medium at 30°C with shaking. The cells were  
148 harvested by centrifugation at 4°C, washed with 50 mL of sterile ice-cold H<sub>2</sub>O, and harvested as  
149 before. The cell pellet was then resuspended in 100 µL/g of cells resuspension buffer (20 mM  
150 Na-HEPES, pH 7.5, and 1.2% w/v PEG-8000) supplemented with 10 µg/mL DNase I and protease  
151 inhibitor cocktail (600 nM leupeptin, 2 µM pepstatin A, 2 mM benzamidine, and 1 mM  
152 phenylmethanesulfonyl fluoride). This cell slurry was slowly dripped into liquid nitrogen to  
153 generate frozen yeast “popcorn”, which was stored at -80°C until use. To cryo-lyse the cells, the  
154 popcorn was ground in a freezer mill with dry ice. The resultant powder was collected into 50-  
155 mL conical tubes that were loosely capped and stored at -80°C overnight to allow the dry ice to  
156 sublimate away. To perform the Hrq1 pull down, the cell powder was resuspended in 2.5 g  
157 powder per 25 mL lysis buffer (40 mM Na-HEPES, pH 7.5, 10% glycerol, 350 mM NaCl, 0.1%  
158 Tween-20, and protease inhibitor cocktail) with gentle agitation. Then, 100 U DNase I and 10 µL  
159 of 30 mg/mL heparin were added, and the sample was incubated for 10 min at room  
160 temperature with gentle agitation. Cellular debris was pelleted by centrifugation at 14,000 x g  
161 for 10 min at 4°C. Then, 100 µL of anti-FLAG agarose slurry was washed and equilibrated with  
162 lysis buffer, and the clarified lysate and anti-FLAG resin were added to a fresh 50-mL conical

163 tube. This suspension was incubated at 4°C overnight on a nutator. The resin and lysate were  
164 subsequently placed in a 30-mL chromatography column, and the lysate was allowed to flow  
165 through the resin by gravity. The anti-FLAG agarose was washed with 30 mL lysis buffer, and the  
166 beads were then resuspended in 150 µL lysis buffer and transferred to a 1.5-mL microcentrifuge  
167 tube. At this point, the sample could be used for proteinase digestion and mass spectrometry  
168 analysis, or proteins could be eluted from the resin and examined by SDS-PAGE and Coomassie  
169 staining. The untagged control strain (MBY4) was also processed as above to identify proteins  
170 that nonspecifically bound to the anti-FLAG agarose.

171

#### 172 **Label-free quantitative proteomics interactome analysis**

173 For on-bead digestion, 500 µL of trypsin digestion buffer (50 mM NH<sub>4</sub>HCO<sub>3</sub>, pH 8.5) was used to  
174 resuspend the FLAG resin. To this slurry, 10 µL of 0.1 µg/µL Trypsin Gold (Promega) was added  
175 and allowed to incubate overnight at 37°C with shaking. After digestion, the FLAG resin was  
176 separated from the digested peptides via spin columns and centrifugation. Formic acid (0.1%  
177 final concentration) was added to the supernatant to quench the reaction. After digestion, the  
178 peptide mix was separated into three equal aliquots. Each replicate was then loaded onto a  
179 microcapillary column. Prior to sample loading, the microcapillary column was packed with  
180 three phases of chromatography resin: reverse phase resin, strong cation resin, and reverse  
181 phase resin, as previous described (FLORENS AND WASHBURN 2006; MOSLEY *et al.* 2011; MOSLEY *et*  
182 *al.* 2013). An LTQ Velos Pro with an in-line Proxeon Easy nLC was utilized for each technical  
183 replicate sample, with a 10-step MudPIT method. In MS1, the 10 most intense ions were

184 selected for MS/MS fragmentation, using collision induced dissociation (CID). Dynamic  
185 exclusion was set to 90 s with a repeat count of one. Protein database matching of RAW files  
186 was performed using SEQUEST and Proteome Discoverer 2.2 (Thermo) against a FASTA  
187 database from the yeast Uniprot proteome. Database search parameters were as follows:  
188 precursor mass tolerance = 1.4 Da, fragment mass tolerance = 0.8 Da, up to two missed  
189 cleavages were allowed, enzyme specificity was set to fully tryptic, and minimum peptide  
190 length = 6 amino acids. The false discovery rate (FDR) for all spectra was <1% for reporting as  
191 PSM. Percolator, within Proteome Discoverer 2.2, was used to calculate the FDR (KALL *et al.*  
192 2007). SAINT probability scores were calculated as outlined in the Contaminant Repository for  
193 Affinity Purification (CRAPome) website (MELLACHERUVU *et al.* 2013) and other publications (  
194 (BREITKREUTZ *et al.* 2010; CHOI *et al.* 2011; CHOI *et al.* 2012; KWON *et al.* 2013).

195

## 196 **Caffeine sensitivity**

197 The sensitivity of *hrq1* mutant cells to caffeine was assessed both qualitatively and  
198 quantitatively. In the first method, cells of the indicated strains were grown overnight in YPD  
199 medium at 30°C with aeration, diluted to  $OD_{600} = 1$  in sterile H<sub>2</sub>O, and then serially diluted 10-  
200 fold to 10<sup>-4</sup>. Five microliters of these dilutions were then spotted onto YPD agar plates and YPD  
201 agar plates supplemented with 10 mM caffeine. The plates were incubated at 30°C for 2 days  
202 before capturing images with a flatbed scanner and scoring growth. In the second method, the  
203 overnight cultures were diluted to  $OD_{600} = 0.01$  into YPD or YPD supplemented with various  
204 concentrations of caffeine. They were then treated as described in (ONONYE *et al.* 2020) with

205 slight modifications. Briefly, 200  $\mu$ L of each culture was placed in duplicate into wells in 96-well  
206 plates, and each well was overlaid with mineral oil to prevent evaporation. The plates were  
207 incubated (30°C with shaking) in a Synergy H1 microplate reader (BioTek), which recorded  
208 OD<sub>660</sub> measurements at 15-min intervals for 24 h. The mean of the OD<sub>660</sub> readings for each  
209 strain was divided by the mean OD<sub>660</sub> of the same strain grown in YPD.

210

### 211 **RNA-seq**

212 Cells were harvested from mid-log phase cultures grown in YPD medium, and total RNA was  
213 prepared using a YeaStar RNA kit (Zymo Research). Sequencing libraries were prepared, and  
214 Illumina sequencing was performed by, Novogene Corporation. Data analysis was then  
215 performed by the Indiana University Center for Genomics and Bioinformatics. The sequences  
216 were trimmed using the Trim Galore script  
217 ([https://www.bioinformatics.babraham.ac.uk/projects/trim\\_galore/](https://www.bioinformatics.babraham.ac.uk/projects/trim_galore/)), and reads were mapped  
218 to the *S. cerevisiae* genome using bowtie2 on local mode (LANGMEAD AND SALZBERG 2012). Reads  
219 were counted, and differential expression analysis were performed using DESeq2 (LOVE *et al.*  
220 2014). Two or three independent replicates of each strain were analyzed.

221

### 222 **Statistical analysis**

223 Data were analyzed and graphed using GraphPad Prism 6 software. The reported values are  
224 averages of  $\geq 3$  independent experiments, and the error bars are the standard deviation. *P*-

225 values were calculated as described in the figure legends, and we defined statistical significance  
226 as  $p < 0.01$ .

227

## 228 **Data availability**

229 Strains, plasmids, RNA-seq data, and other experimental reagents are available upon request.

230 File S1 contains detailed descriptions of all supplemental files, as well as Table S1 and Figure S1.

231 File S2 contains the full SGA result. File S3 contains the full SAINT analysis results. File S4

232 contains the transcriptomic changes identified by RNA-seq.

233

## 234 **RESULTS AND DISCUSSION**

### 235 **The genetic interactome of *HRQ1***

236 We crossed the *hrq1Δ* and *hrq1-K318A* alleles to the single-gene deletion and TS allele

237 collections to generate all possible double mutants and assessed the growth of the resulting

238 spore clones to identify negative and positive genetic interactions (Tables S2-S5). In total, 117

239 significant ( $p < 0.05$ ) genetic interactions (76 negative and 41 positive) were identified between

240 *hrq1Δ* and the single-gene deletion collection (Table S2), and 119 (65 negative and 54 positive)

241 were identified between *hrq1Δ* and the TS alleles collection (Table S3). Similarly, 132 significant

242 ( $p < 0.05$ ) genetic interactions (84 negative and 48 positive) were identified between *hrq1-*

243 *K318A* and the single-gene deletion collection (Table S4), and 102 (41 negative and 61 positive)

244 were identified between *hrq1K318A* and the TS alleles collection (Table S5). When comparing

245 the *hrq1Δ* and *hrq1-K318A* data sets in aggregate, there was ~39% overlap between the  
246 negative genetic interactions (Fig. 1A) and >30% overlap between the positive genetic  
247 interactions (Fig. 1B). However, there was very little overlap when comparing negative to  
248 positive genetic interactions and *vice versa* (Fig. 1C,D).

249

250 Next, we used GO Term mapping to identify cellular processes enriched for *hrq1* interactors.  
251 For all of the negative genetic interactions with *hrq1Δ* and *hrq1-K318A*, the top 10 GO terms  
252 were transcription by RNA polymerase II, regulation of organelle organization, DNA repair,  
253 chromatin organization, mitotic cell cycle, peptidyl-amino acid modification, cytoskeleton  
254 organization, mitochondrion organization, organelle fission, and response to chemical (Table 2).  
255 Similarly, for all of the positive genetic interactions with *hrq1Δ* and *hrq1-K318A*, the top 10 GO  
256 terms were mitotic cell cycle, cytoskeleton organization, regulation of organelle organization,  
257 lipid metabolic process, DNA repair, transcription by RNA polymerase II, chromatin  
258 organization, chromosome segregation, organelle fission, and rRNA processing (Table 3).

259

260 A discussion of the strongest negative synthetic genetic interactions with *hrq1Δ* and *hrq1-*  
261 *K318A* is included in Sanders *et al.* (companion paper)<sup>2</sup> Briefly, this included synthetic  
262 interactions with genes encoding genome integrity factors (*e.g.*, *RAD14* and *CBC2*) and

---

<sup>2</sup> Sanders *et al.*, Comprehensive synthetic genetic array analysis of alleles that interact with mutation of the *Saccharomyces cerevisiae* RecQ helicases Hrq1 and Sgs1, submitted as a companion paper to G3.

263 mitochondrial proteins (*e.g.*, *MRM2* and *TOM70*), consistent with the known roles of Hrq1 and  
264 human RECQL4 in genome maintenance (GHOSH *et al.* 2011; SINGH *et al.* 2012; CHOI *et al.* 2013;  
265 BOCHMAN *et al.* 2014; CHOI *et al.* 2014; LEUNG *et al.* 2014; ROGERS *et al.* 2017; NICKENS *et al.* 2018;  
266 ROGERS *et al.* 2020) and their nuclear and mitochondrial localization (CROTEAU *et al.* 2012; KOH *et*  
267 *al.* 2015; KUMARI *et al.* 2016).

268

269 Deletion alleles of *ARP8* and *SHE1* and TS alleles of *ACT1*, *ARP3*, *CSE2*, *MPS1*, and *MPS3* are  
270 among the strongest positive synthetic genetic interactors with *hrq1Δ* and/or *hrq1-K318A*  
271 (Tables S3 and S5). Arp8 is a chromatin remodeling factor (SHEN *et al.* 2000), and Cse2 is a  
272 Mediator complex subunit required for RNA polymerase II regulation (GUSTAFSSON *et al.* 1998),  
273 consistent with the GO Term enrichment described above. This may suggest that like human  
274 RECQL5 (AYGUN *et al.* 2008; IZUMIKAWA *et al.* 2008; SAPONARO *et al.* 2014), Hrq1 plays a role in  
275 transcription.

276

277 She1 is a microtubule-associated protein (BERGMAN *et al.* 2012), as is human RECQL4 (YOKOYAMA  
278 *et al.* 2019). Likewise, Mps1 and Mps3 are linked to the microtubule cytoskeleton as proteins  
279 necessary for spindle pole body function (FRIEDERICHS *et al.* 2011; MEYER *et al.* 2013). We  
280 attempted to determine if Hrq1 also binds to microtubules using an *in vitro* microtubule co-  
281 sedimentation assay (WALKER *et al.* 2019), but found that Hrq1 alone pellets during  
282 ultracentrifugation (data not shown). We hypothesize that this is due to the natively disordered  
283 N-terminus of Hrq1 (ROGERS *et al.* 2017; ROGERS *et al.* 2020), which may mediate liquid-liquid

284 phase separation (LLPS) of recombinant Hrq1 in solution. Ongoing experiments are addressing  
285 the LLPS of Hrq1 alone and in combination with its ICL repair cofactor Pso2 (ROGERS *et al.* 2020).

286

287 *ACT1* encodes the *S. cerevisiae* actin protein (GALLWITZ AND SEIDEL 1980), and Arp3 is a subunit of  
288 the Arp2/3 complex that acts as an actin nucleation center (MACHESKY AND GOULD 1999). It is  
289 unclear why mutation of these cytoskeletal factors yields increased growth in combination with  
290 *hrq1* mutations. However, *arp3* mutation also decreases telomere length (UNGAR *et al.* 2009).  
291 Thus, this synthetic genetic effect may be related to the role of Hrq1 in telomere maintenance  
292 (BOCHMAN *et al.* 2014; NICKENS *et al.* 2018).

293

#### 294 **The physical interactome of Hrq1**

295 To complement our genetic analysis of *hrq1* alleles, we also sought to identify the proteins that  
296 physically interact with Hrq1 *in vivo*. To do this, we cloned the sequence for a 3xFLAG tag in  
297 frame to the 3' end of the *HRQ1* gene, replacing its native stop codon. The tag does not disrupt  
298 any known activities of Hrq1, as demonstrated by the DNA ICL resistance of the Hrq1-3xFLAG  
299 strain (Fig. S1 and data not shown). Next, we snap-froze and cryo-lysed cells to preserve  
300 macromolecular complexes in near-native states (MOSLEY *et al.* 2011), immunoprecipitated  
301 Hrq1-3xFLAG and its associated proteins from the lysates, and analyzed them using a  
302 quantitative proteomics approach.

303



304 Overall, 290 interacting proteins were identified (Table S6), 77 of which had a SAINT score >  
305 0.75 and were thus considered significant (Fig. 2A). These 77 proteins are enriched for GO Term  
306 processes such as rRNA processing, ribosomal small subunit biogenesis, ribosomal large subunit  
307 biogenesis, cytoplasmic translation, transcription by RNA polymerase I, transcription by RNA  
308 polymerase II, RNA modification, DNA repair, chromatin organization, and peptidyl-amino acid  
309 modification (Table 4). Further, these categories are representative of the entire set of 290  
310 proteins.

311

312 To demonstrate the robustness of these data, we identified Hrq1-interacting proteins that are  
313 subunits of larger macromolecular complexes involved in several of the GO Term processes  
314 listed above. For instance, among the rRNA processing and ribosomal small subunit biogenesis  
315 proteins (Fig. 2B), several members of the small ribosomal subunit processome  
316 (<https://www.yeastgenome.org/complex/CPX-1604>) are significant Hrq1 interactors. Many  
317 more such proteins had SAINT scores < 0.75, suggesting that they may be secondary interactors  
318 (*i.e.*, they physically interact with a significant Hrq1 interactor rather than Hrq1 directly) and/or  
319 more weakly associated subunits of the processome. Similarly, the transcription by RNA  
320 polymerase I (Fig. 2C) and transcription by RNA polymerase II (Fig. 2D) proteins contain  
321 members of multiple macromolecular complexes, including the RNA polymerase I  
322 (<https://www.yeastgenome.org/complex/CPX-1664>) and RNA polymerase II  
323 (<https://www.yeastgenome.org/complex/CPX-2662>) complexes themselves. As with the SGA  
324 data above, these links to transcription are intriguing and reminiscent of the links of human  
325 RECQL5 to transcription (AYGUN *et al.* 2008; IZUMIKAWA *et al.* 2008; SAPONARO *et al.* 2014).

326

### 327 **Transcriptomic perturbations caused by mutation of *HRQ1***

328 Due to the links between the Hrq1 and transcription identified through SGA and  
329 immunoprecipitation-mass spectrometry (IP-MS), we decided to determine if the *S. cerevisiae*  
330 transcriptome is altered by *HRQ1* mutation. First, we tested the effects of the general  
331 transcription stressor caffeine (KURANDA *et al.* 2006) on *hrq1Δ* and *hrq1-K318A* cells. As shown  
332 in Figure 3A, the *hrq1-K318A* strain was much more sensitive to 10 mM caffeine than wild-type,  
333 though the *hrq1Δ* strain displayed little-to-no caffeine sensitivity. To obtain more quantitative  
334 data, we performed growth curve experiments for wild-type, *hrq1Δ*, and *hrq1-K318A* cells in  
335 the absence and presence of increasing concentrations of caffeine. At high levels of caffeine,  
336 the *hrq1Δ* strain was significantly ( $p < 0.0001$ ) more sensitive than wild-type, but again, the  
337 *hrq1-K318A* mutant displayed greater sensitivity at a wider range of concentrations (Fig. 2B).  
338 These data mirror the increased sensitivity of the *hrq1-K318A* strain to DNA ICL damage  
339 compared to the *hrq1Δ* mutant (BOCHMAN *et al.* 2014; ROGERS *et al.* 2020), suggesting that the  
340 Hrq1-K318A protein is still recruited to its sites of action *in vivo* but somehow disrupts  
341 transcription as a catalytically inert roadblock.

342

343 To gain a transcriptome-wide perspective, we also performed RNA-seq analysis of wild-type,  
344 *hrq1Δ*, and *hrq1-K318A* cells. Compared to wild-type, 107 genes were significantly  
345 downregulated and 28 genes were significantly upregulated in *hrq1Δ* cells (Table S7). Similarly,  
346 301 and 124 genes were down- and upregulated, respectively, in *hrq1-K318A* cells compared to

347 wild-type. Similar to the SGA and proteomic data sets, the GO Terms of these differentially  
348 expressed genes (DEGs) were enriched for processes such as response to chemical, meiotic cell  
349 cycle, mitotic cell cycle, rRNA processing, and chromosome segregation (Table S8).

350

351 Figure 3C shows the frequency distribution of all of the changes in expression in the *hrq1* cells  
352 compared to wild-type, separated by down- and upregulated DEGs for each mutant. Outliers  
353 are denoted as single points, representing the transcripts whose abundances changed the  
354 most. The expression changes in most DEGs were mild decreases or increases, but several  
355 varied greatly from wild-type. As an internal control, we found that the transcription of *HRQ1* in  
356 *hrq1Δ* cells displayed the largest decrease among all data sets relative to wild-type (Fig. 3C).

357

358 The largest number of outliers were the 10 upregulated DEGs in *hrq1-K318A* cells. These  
359 included genes encoding two cell wall mannoproteins (*TIP1* and *CWP1*) (VAN DER VAART *et al.*  
360 1995; FUJII *et al.* 1999), a heat shock protein (*HSP30*) (PIPER *et al.* 1997), a protein required for  
361 viability in cells lacking mitochondrial DNA (*ICY1*) (DUNN AND JENSEN 2003), a predicted  
362 transcription factor whose nuclear localization increases upon DNA replication stress (*STP4*)  
363 (TKACH *et al.* 2012), a protein of unknown function whose levels increase in response to  
364 replication stress (*YER053C-A*), a factor whose over-expression blocks cells in G1 phase (*CIP1*)  
365 (REN *et al.* 2016), and three proteins of unknown function that are induced by ICL damage  
366 (*YLR297W*, *TDA6*, and *FMP48*) (DARDALHON *et al.* 2007). The latter are particularly tantalizing  
367 considering the known function of Hrq1 in ICL repair (BOCHMAN 2014; ROGERS *et al.* 2017; ROGERS

368 *et al.* 2020). Perhaps the *YLR297W*, *TDA6*, and *FMP48* gene products function in the Hrq1-Pso2  
369 ICL repair pathway, and their levels must be elevated to compensate for the catalytically  
370 crippled Hrq1-K318A mutant. Alternatively, they may represent members of a back-up ICL  
371 repair pathway that is activated when the Hrq1-Pso2 pathway is ablated. In either case, it  
372 should be noted that the RNA-seq experiments were performed in the absence of exogenous  
373 ICL damage, but the *hrq1-K318A* cells appear already primed to deal with ICLs in the absence of  
374 functional Hrq1. The reasons for this are currently unknown, but our ongoing experiments are  
375 addressing this phenomenon.

376

## 377 **Conclusions and perspectives**

378 Here, we used a multi-omics approach to comprehensively determine the *S. cerevisiae* Hrq1  
379 interactome. The data reported here and in our companion manuscript (Sanders *et al.*,  
380 companion paper) greatly expand the known genetic and physical interaction landscape of Hrq1  
381 in yeast, including synthetic genetic interactions with and transcriptomic changes caused by the  
382 strong *hrq1-K318A* allele. Various links to the known and putative roles of Hrq1 and its  
383 homologs in DNA repair, telomere maintenance, and the mitochondria were found, as well as  
384 novel connections to the cytoskeleton and transcription.

385

386 Our concurrent data also indicate that the second *S. cerevisiae* RecQ family helicase, Sgs1, is  
387 also involved in transcription (Sanders *et al.*, companion paper). However, it is unclear if Hrq1

388 and Sgs1 act together during transcription or have distinct roles, and it is unknown what these  
389 roles are. Human RECQL5 physically interacts with RNA polymerase II, controlling transcription  
390 elongation (SAPONARO *et al.* 2014). It may also function at the interface of DNA repair and  
391 transcription by helping to resolve replication-transcription conflicts (HAMADEH AND LANSDORP  
392 2020). It is reasonable to hypothesize that Hrq1 and/or Sgs1 function similarly and, in the case  
393 of Hrq1, perhaps in the transcription-coupled repair of DNA ICL lesions. Future work should  
394 address these hypotheses, as well as the others raised throughout this manuscript, to further  
395 characterize the roles of RecQ helicases in the maintenance of genome integrity. Similar to the  
396 mechanistic identification of the roles of Hrq1 in yeast (BOCHMAN 2014; NICKENS *et al.* 2018;  
397 ROGERS *et al.* 2020), we anticipate that these data will spur additional research into exciting and  
398 unexpected functions of RecQ4 subfamily helicases.

399

400

#### ACKNOWLEDGEMENTS

401 We thank Amy Caudy for sharing plasmids, the University of Toronto for performing the SGA  
402 analyses, Michael Costanzo and members of the Boone lab for help with data collection and  
403 interpretation, and members of the Bochman and Mosley labs for critically reading this  
404 manuscript. This research was supported by the College of Arts and Sciences, Indiana University  
405 (to MLB), the Indiana University Collaborative Research Grant fund of the Office of the Vice  
406 President for Research (to MLB and ALM), the American Cancer Society (RSG-16-180-01-DMC to  
407 MLB), and the National Institutes of Health (1R35GM133437 to MLB).

408

409

#### FOOTNOTES

410 <sup>1</sup> Sanders *et al.*, Comprehensive synthetic genetic array analysis of alleles that interact with  
411 mutation of the *Saccharomyces cerevisiae* RecQ helicases Hrq1 and Sgs1, submitted as a  
412 companion paper to G3.

413

414

## LITERATURE CITED

- 415 Abdelhaleem, M., 2010 Helicases: an overview. *Methods Mol Biol* 587: 1-12.
- 416 Aygun, O., J. Svejstrup and Y. Liu, 2008 A RECQ5-RNA polymerase II association identified by targeted  
417 proteomic analysis of human chromatin. *Proc Natl Acad Sci U S A* 105: 8580-8584.
- 418 Bergman, Z. J., X. Xia, I. A. Amaro and T. C. Huffaker, 2012 Constitutive dynein activity in She1 mutants  
419 reveals differences in microtubule attachment at the yeast spindle pole body. *Mol Biol Cell* 23:  
420 2319-2326.
- 421 Bochman, M. L., 2014 Roles of DNA helicases in the maintenance of genome integrity. *Mol Cell Oncol* 1:  
422 e963429.
- 423 Bochman, M. L., K. Paeschke, A. Chan and V. A. Zakian, 2014 Hrq1, a Homolog of the Human RecQ4  
424 Helicase, Acts Catalytically and Structurally to Promote Genome Integrity. *Cell Rep* 6: 346-356.
- 425 Bretkreutz, A., H. Choi, J. R. Sharom, L. Boucher, V. Neduva *et al.*, 2010 A global protein kinase and  
426 phosphatase interaction network in yeast. *Science* 328: 1043-1046.
- 427 Brosh, R. M., Jr., and S. W. Matson, 2020 History of DNA Helicases. *Genes (Basel)* 11.
- 428 Capp, C., J. Wu and T. S. Hsieh, 2010 RecQ4: the second replicative helicase? *Crit Rev Biochem Mol Biol*  
429 45: 233-242.
- 430 Choi, D. H., R. Lee, S. H. Kwon and S. H. Bae, 2013 Hrq1 functions independently of Sgs1 to preserve  
431 genome integrity in *Saccharomyces cerevisiae*. *J Microbiol* 51: 105-112.
- 432 Choi, D. H., M. H. Min, M. J. Kim, R. Lee, S. H. Kwon *et al.*, 2014 Hrq1 facilitates nucleotide excision repair  
433 of DNA damage induced by 4-nitroquinoline-1-oxide and cisplatin in *Saccharomyces cerevisiae*. *J*  
434 *Microbiol* 52: 292-298.
- 435 Choi, H., B. Larsen, Z. Y. Lin, A. Bretkreutz, D. Mellacheruvu *et al.*, 2011 SAINT: probabilistic scoring of  
436 affinity purification-mass spectrometry data. *Nat Methods* 8: 70-73.

437 Choi, H., G. Liu, D. Mellacheruvu, M. Tyers, A. C. Gingras *et al.*, 2012 Analyzing protein-protein  
438 interactions from affinity purification-mass spectrometry data with SAINT. *Curr Protoc*  
439 *Bioinformatics Chapter 8: Unit8 15*.

440 Croteau, D. L., M. L. Rossi, C. Canugovi, J. Tian, P. Sykora *et al.*, 2012 RECQL4 localizes to mitochondria  
441 and preserves mitochondrial DNA integrity. *Aging Cell 11: 456-466*.

442 Dardalhon, M., W. Lin, A. Nicolas and D. Aeverbeck, 2007 Specific transcriptional responses induced by 8-  
443 methoxypsoralen and UVA in yeast. *FEMS Yeast Res 7: 866-878*.

444 Dunn, C. D., and R. E. Jensen, 2003 Suppression of a defect in mitochondrial protein import identifies  
445 cytosolic proteins required for viability of yeast cells lacking mitochondrial DNA. *Genetics 165:*  
446 *35-45*.

447 Eki, T., 2010 Genome-Wide Survey and Comparative Study of Helicase Superfamily Members in  
448 Sequences Genomes, pp. 168-203 in *Advances in Genetics Research*, edited by K. V. Urbano.  
449 Nova Science Publishers.

450 Florens, L., and M. P. Washburn, 2006 Proteomic analysis by multidimensional protein identification  
451 technology. *Methods Mol Biol 328: 159-175*.

452 Friederichs, J. M., S. Ghosh, C. J. Smoyer, S. McCroskey, B. D. Miller *et al.*, 2011 The SUN protein Mps3 is  
453 required for spindle pole body insertion into the nuclear membrane and nuclear envelope  
454 homeostasis. *PLoS Genet 7: e1002365*.

455 Fujii, T., H. Shimoi and Y. Iimura, 1999 Structure of the glucan-binding sugar chain of Tip1p, a cell wall  
456 protein of *Saccharomyces cerevisiae*. *Biochim Biophys Acta 1427: 133-144*.

457 Funakoshi, M., and M. Hochstrasser, 2009 Small epitope-linker modules for PCR-based C-terminal  
458 tagging in *Saccharomyces cerevisiae*. *Yeast 26: 185-192*.

459 Gallwitz, D., and R. Seidel, 1980 Molecular cloning of the actin gene from yeast *Saccharomyces*  
460 *cerevisiae*. *Nucleic Acids Res 8: 1043-1059*.



461 Ghosh, A. K., M. L. Rossi, D. K. Singh, C. Dunn, M. Ramamoorthy *et al.*, 2011 RECQL4, the protein  
462 mutated in Rothmund-Thomson syndrome, functions in telomere maintenance. *J Biol Chem*  
463 287: 196-209.

464 Giaever, G., and C. Nislow, 2014 The yeast deletion collection: a decade of functional genomics. *Genetics*  
465 197: 451-465.

466 Gustafsson, C. M., L. C. Myers, J. Beve, H. Spahr, M. Lui *et al.*, 1998 Identification of new mediator  
467 subunits in the RNA polymerase II holoenzyme from *Saccharomyces cerevisiae*. *J Biol Chem* 273:  
468 30851-30854.

469 Hamadeh, Z., and P. Lansdorp, 2020 RECQL5 at the Intersection of Replication and Transcription. *Front*  
470 *Cell Dev Biol* 8: 324.

471 Hickson, I. D., 2003 RecQ helicases: caretakers of the genome. *Nat Rev Cancer* 3: 169-178.

472 Izumikawa, K., M. Yanagida, T. Hayano, H. Tachikawa, W. Komatsu *et al.*, 2008 Association of human  
473 DNA helicase RecQ5beta with RNA polymerase II and its possible role in transcription. *Biochem J*  
474 413: 505-516.

475 Jin, W., H. Liu, Y. Zhang, S. K. Otta, S. E. Plon *et al.*, 2008 Sensitivity of RECQL4-deficient fibroblasts from  
476 Rothmund-Thomson syndrome patients to genotoxic agents. *Hum Genet* 123: 643-653.

477 Kall, L., J. D. Canterbury, J. Weston, W. S. Noble and M. J. MacCoss, 2007 Semi-supervised learning for  
478 peptide identification from shotgun proteomics datasets. *Nat Methods* 4: 923-925.

479 Kamimura, Y., H. Masumoto, A. Sugino and H. Araki, 1998 Sld2, which interacts with Dpb11 in  
480 *Saccharomyces cerevisiae*, is required for chromosomal DNA replication. *Mol Cell Biol* 18: 6102-  
481 6109.

482 Keller, H., K. Kiosze, J. Sachsenweger, S. Haumann, O. Ohlenschlager *et al.*, 2014 The intrinsically  
483 disordered amino-terminal region of human RecQL4: multiple DNA-binding domains confer  
484 annealing, strand exchange and G4 DNA binding. *Nucleic Acids Res* 42: 12614-12627.

- 485 Kofoed, M., K. L. Milbury, J. H. Chiang, S. Sinha, S. Ben-Aroya *et al.*, 2015 An Updated Collection of  
486 Sequence Barcoded Temperature-Sensitive Alleles of Yeast Essential Genes. *G3* (Bethesda) 5:  
487 1879-1887.
- 488 Koh, J. L., Y. T. Chong, H. Friesen, A. Moses, C. Boone *et al.*, 2015 CYCLOPs: A Comprehensive Database  
489 Constructed from Automated Analysis of Protein Abundance and Subcellular Localization  
490 Patterns in *Saccharomyces cerevisiae*. *G3* (Bethesda) 5: 1223-1232.
- 491 Kumari, J., M. Hussain, S. De, S. Chandra, P. Modi *et al.*, 2016 Mitochondrial functions of RECQL4 are  
492 required for the prevention of aerobic glycolysis-dependent cell invasion. *J Cell Sci* 129: 1312-  
493 1318.
- 494 Kuranda, K., V. Leberre, S. Sokol, G. Palamarczyk and J. Francois, 2006 Investigating the caffeine effects  
495 in the yeast *Saccharomyces cerevisiae* brings new insights into the connection between TOR,  
496 PKC and Ras/cAMP signalling pathways. *Mol Microbiol* 61: 1147-1166.
- 497 Kwon, Y., A. Vinayagam, X. Sun, N. Dephoure, S. P. Gygi *et al.*, 2013 The Hippo signaling pathway  
498 interactome. *Science* 342: 737-740.
- 499 Langmead, B., and S. L. Salzberg, 2012 Fast gapped-read alignment with Bowtie 2. *Nat Methods* 9: 357-  
500 359.
- 501 Leung, G. P., M. J. Aristizabal, N. J. Krogan and M. S. Kobor, 2014 Conditional genetic interactions of  
502 RTT107, SLX4, and HRQ1 reveal dynamic networks upon DNA damage in *S. cerevisiae*. *G3*  
503 (Bethesda) 4: 1059-1069.
- 504 Lichten, M., 2014 Tetrad, random spore, and molecular analysis of meiotic segregation and  
505 recombination. *Methods Mol Biol* 1205: 13-28.
- 506 Liu, Y., 2010 Rothmund-Thomson syndrome helicase, RECQ4: On the crossroad between DNA replication  
507 and repair. *DNA Repair (Amst)* 9: 325-330.

- 508 Love, M. I., W. Huber and S. Anders, 2014 Moderated estimation of fold change and dispersion for RNA-  
509 seq data with DESeq2. *Genome Biol* 15: 550.
- 510 Machesky, L. M., and K. L. Gould, 1999 The Arp2/3 complex: a multifunctional actin organizer. *Curr Opin*  
511 *Cell Biol* 11: 117-121.
- 512 Macris, M. A., L. Krejci, W. Bussen, A. Shimamoto and P. Sung, 2006 Biochemical characterization of the  
513 RECQ4 protein, mutated in Rothmund-Thomson syndrome. *DNA Repair (Amst)* 5: 172-180.
- 514 Mellacheruvu, D., Z. Wright, A. L. Couzens, J. P. Lambert, N. A. St-Denis *et al.*, 2013 The CRAPome: a  
515 contaminant repository for affinity purification-mass spectrometry data. *Nat Methods* 10: 730-  
516 736.
- 517 Meyer, R. E., S. Kim, D. Obeso, P. D. Straight, M. Winey *et al.*, 2013 Mps1 and Ipl1/Aurora B act  
518 sequentially to correctly orient chromosomes on the meiotic spindle of budding yeast. *Science*  
519 339: 1071-1074.
- 520 Monnat, R. J., Jr., 2010 Human RECQ helicases: roles in DNA metabolism, mutagenesis and cancer  
521 biology. *Seminars in cancer biology* 20: 329-339.
- 522 Mosley, A. L., G. O. Hunter, M. E. Sardi, M. Smolle, J. L. Workman *et al.*, 2013 Quantitative proteomics  
523 demonstrates that the RNA polymerase II subunits Rpb4 and Rpb7 dissociate during  
524 transcriptional elongation. *Mol Cell Proteomics* 12: 1530-1538.
- 525 Mosley, A. L., M. E. Sardi, S. G. Pattenden, J. L. Workman, L. Florens *et al.*, 2011 Highly reproducible  
526 label free quantitative proteomic analysis of RNA polymerase complexes. *Mol Cell Proteomics*  
527 10: M110 000687.
- 528 Nickens, D. G., C. M. Rogers and M. L. Bochman, 2018 The *Saccharomyces cerevisiae* Hrq1 and Pif1 DNA  
529 helicases synergistically modulate telomerase activity in vitro. *J Biol Chem* 293: 14481-14496.
- 530 Ononye, O. E., C. W. Sausen, L. Balakrishnan and M. L. Bochman, 2020 Nuclear Pif1 is Post  
531 Translationally Modified and Regulated by Lysine Acetylation. *bioRxiv*.

- 532 Piper, P. W., C. Ortiz-Calderon, C. Holyoak, P. Coote and M. Cole, 1997 Hsp30, the integral plasma  
533 membrane heat shock protein of *Saccharomyces cerevisiae*, is a stress-inducible regulator of  
534 plasma membrane H(+)-ATPase. *Cell Stress Chaperones* 2: 12-24.
- 535 Ren, P., A. Malik and F. Zeng, 2016 Identification of YPL014W (Cip1) as a novel negative regulator of  
536 cyclin-dependent kinase in *Saccharomyces cerevisiae*. *Genes Cells* 21: 543-552.
- 537 Rogers, C. M., C. Y. Lee, S. Parkins, N. J. Buehler, S. Wenzel *et al.*, 2020 The yeast Hrq1 helicase  
538 stimulates Pso2 translesion nuclease activity and thereby promotes DNA inter-strand cross-link  
539 repair. *J Biol Chem*.
- 540 Rogers, C. M., J. C. Wang, H. Noguchi, T. Imasaki, Y. Takagi *et al.*, 2017 Yeast Hrq1 shares structural and  
541 functional homology with the disease-linked human RecQ4 helicase. *Nucleic Acids Res* 45: 5217-  
542 5230.
- 543 Saponaro, M., T. Kantidakis, R. Mitter, G. P. Kelly, M. Heron *et al.*, 2014 RECQL5 controls transcript  
544 elongation and suppresses genome instability associated with transcription stress. *Cell* 157:  
545 1037-1049.
- 546 Shen, X., G. Mizuguchi, A. Hamiche and C. Wu, 2000 A chromatin remodelling complex involved in  
547 transcription and DNA processing. *Nature* 406: 541-544.
- 548 Sikorski, R. S., and P. Hieter, 1989 A system of shuttle vectors and yeast host strains designed for  
549 efficient manipulation of DNA in *Saccharomyces cerevisiae*. *Genetics* 122: 19-27.
- 550 Singh, D. K., V. Popuri, T. Kulikowicz, I. Shevelev, A. K. Ghosh *et al.*, 2012 The human RecQ helicases BLM  
551 and RECQL4 cooperate to preserve genome stability. *Nucleic Acids Res* 40: 6632-6648.
- 552 Suhasini, A. N., and R. M. Brosh, Jr., 2013 Disease-causing missense mutations in human DNA helicase  
553 disorders. *Mutat Res* 752: 138-152.

554 Tkach, J. M., A. Yimit, A. Y. Lee, M. Riffle, M. Costanzo *et al.*, 2012 Dissecting DNA damage response  
555 pathways by analysing protein localization and abundance changes during DNA replication  
556 stress. *Nat Cell Biol* 14: 966-976.

557 Tong, A. H., M. Evangelista, A. B. Parsons, H. Xu, G. D. Bader *et al.*, 2001 Systematic genetic analysis with  
558 ordered arrays of yeast deletion mutants. *Science* 294: 2364-2368.

559 Tong, A. H., G. Lesage, G. D. Bader, H. Ding, H. Xu *et al.*, 2004 Global mapping of the yeast genetic  
560 interaction network. *Science* 303: 808-813.

561 Uchiumi, F., M. Seki and Y. Furuichi, 2015 Helicases and human diseases. *Front Genet* 6: 39.

562 Ungar, L., N. Yosef, Y. Sela, R. Sharan, E. Ruppin *et al.*, 2009 A genome-wide screen for essential yeast  
563 genes that affect telomere length maintenance. *Nucleic Acids Res* 37: 3840-3849.

564 van der Vaart, J. M., L. H. Caro, J. W. Chapman, F. M. Klis and C. T. Verrips, 1995 Identification of three  
565 mannoproteins in the cell wall of *Saccharomyces cerevisiae*. *J Bacteriol* 177: 3104-3110.

566 Van Maldergem, L., J. Piard, L. Larizza and L. L. Wang, 1993 Baller-Gerold Syndrome in *GeneReviews*((R)),  
567 edited by M. P. Adam, H. H. Ardinger, R. A. Pagon, S. E. Wallace, L. J. H. Bean *et al.*, Seattle (WA).

568 Vargas, F. R., J. C. de Almeida, J. C. Llerena Junior and D. F. Reis, 1992 RAPADILINO syndrome. *Am J Med*  
569 *Genet* 44: 716-719.

570 Walker, B. C., W. Tempel, H. Zhu, H. Park and J. C. Cochran, 2019 Chromokinesins NOD and KID Use  
571 Distinct ATPase Mechanisms and Microtubule Interactions To Perform a Similar Function.  
572 *Biochemistry* 58: 2326-2338.

573 Yokoyama, H., D. Moreno-Andres, S. A. Astrinidis, Y. Hao, M. Weberruss *et al.*, 2019 Chromosome  
574 alignment maintenance requires the MAP RECQL4, mutated in the Rothmund-Thomson  
575 syndrome. *Life Sci Alliance* 2.

576

577

## TABLES

578 **Table 1. Strains used in this study.**

| <b>Name</b> | <b>Genotype</b>                                                                                                                                                                                               | <b>Source</b>                |
|-------------|---------------------------------------------------------------------------------------------------------------------------------------------------------------------------------------------------------------|------------------------------|
| Y8205       | <i>MAT<math>\alpha</math> can1<math>\Delta</math>::STE2pr-Sp_his5 lyp1<math>\Delta</math>::STE3pr-LEU2 his3<math>\Delta</math>1 leu2<math>\Delta</math>0 ura3<math>\Delta</math>0</i>                         | (TONG <i>et al.</i> 2001)    |
| YPH499      | <i>MAT<math>\alpha</math> ura3-52 lys2-801_amber ade2-101_ochre trp1<math>\Delta</math>63 his3<math>\Delta</math>200 leu2<math>\Delta</math>1</i>                                                             | (SIKORSKI AND HIETER 1989)   |
| MBY346      | <i>MAT<math>\alpha</math> ura3-52 lys2-801_amber ade2-101_ochre trp1<math>\Delta</math>63 his3<math>\Delta</math>200 leu2<math>\Delta</math>1 hxt13::URA3 hrq1::hrq1-K318A-NatMX</i>                          | (BOCHMAN <i>et al.</i> 2014) |
| MBY520      | <i>MAT<math>\alpha</math> ura3-52 lys2-801_amber ade2-101_ochre trp1<math>\Delta</math>63 his3<math>\Delta</math>200 leu2<math>\Delta</math>1 HRQ1:3xFLAG-His3MX6</i>                                         | This study                   |
| MBY639      | <i>MAT<math>\alpha</math> can1<math>\Delta</math>::STE2pr-Sp_his5 lyp1<math>\Delta</math>::STE3pr-LEU2 his3<math>\Delta</math>1 leu2<math>\Delta</math>0 ura3<math>\Delta</math>0 hrq1::NatMX</i>             | This study                   |
| MBY644      | <i>MAT<math>\alpha</math> can1<math>\Delta</math>::STE2pr-Sp_his5 lyp1<math>\Delta</math>::STE3pr-LEU2 his3<math>\Delta</math>1 leu2<math>\Delta</math>0 ura3<math>\Delta</math>0 hrq1::hrq1-K318A(NatMX)</i> | This study                   |

579

580 **Table 2. Gene Ontology (GO) Term enrichment of negative genetic interactors with *hrq1*.**

| GO Term (GO ID)                                                   | Genes Annotated to the GO Term                                                                                                                                                                                                                                                                                                                                                                                                                                                                                                                                                                                                                                             | GO Term Usage in Gene List | Genome Frequency of Use            |
|-------------------------------------------------------------------|----------------------------------------------------------------------------------------------------------------------------------------------------------------------------------------------------------------------------------------------------------------------------------------------------------------------------------------------------------------------------------------------------------------------------------------------------------------------------------------------------------------------------------------------------------------------------------------------------------------------------------------------------------------------------|----------------------------|------------------------------------|
| <a href="#">transcription by RNA polymerase II</a> (GO:0006366)   | <a href="#">ABF1</a> , <a href="#">CDC28</a> , <a href="#">CDC73</a> , <a href="#">CEG1</a> , <a href="#">CSE2</a> , <a href="#">EAF7</a> , <a href="#">ESS1</a> , <a href="#">GIM3</a> , <a href="#">HMO1</a> , <a href="#">HTZ1</a> , <a href="#">MED11</a> , <a href="#">NAB3</a> , <a href="#">NUT1</a> , <a href="#">RAD4</a> , <a href="#">SDS3</a> , <a href="#">SGF73</a> , <a href="#">SIN3</a> , <a href="#">SPT15</a> , <a href="#">SPT3</a> , <a href="#">SPT8</a> , <a href="#">SRB2</a> , <a href="#">SRB6</a> , <a href="#">STH1</a> , <a href="#">SUA7</a> , <a href="#">SWI4</a> , <a href="#">TAF11</a> , <a href="#">TAF2</a> , <a href="#">YJR084W</a> | 28 of 191 genes, 14.66%    | 536 of 6436 annotated genes, 8.33% |
| <a href="#">regulation of organelle organization</a> (GO:0033043) | <a href="#">APC4</a> , <a href="#">BDF2</a> , <a href="#">CDC15</a> , <a href="#">CDC20</a> , <a href="#">CDC28</a> , <a href="#">CDC73</a> , <a href="#">CTI6</a> , <a href="#">DAM1</a> , <a href="#">EFB1</a> , <a href="#">ESS1</a> , <a href="#">GIC1</a> , <a href="#">LTE1</a> , <a href="#">MOB1</a> , <a href="#">PEF1</a> , <a href="#">PSE1</a> , <a href="#">SDS3</a> , <a href="#">SIN3</a> , <a href="#">SPO16</a> , <a href="#">TGS1</a> , <a href="#">UTH1</a> , <a href="#">VPS41</a>                                                                                                                                                                     | 21 of 191 genes, 10.99%    | 326 of 6436 annotated genes, 5.07% |
| <a href="#">DNA repair</a> (GO:0006281)                           | <a href="#">ABF1</a> , <a href="#">ACT1</a> , <a href="#">BDF2</a> , <a href="#">CDC28</a> , <a href="#">CDC73</a> , <a href="#">CST9</a> , <a href="#">EAF7</a> , <a href="#">NSE4</a> , <a href="#">NSE5</a> , <a href="#">POL1</a> , <a href="#">PRP19</a> , <a href="#">RAD14</a> , <a href="#">RAD33</a> , <a href="#">RAD4</a> , <a href="#">RAD52</a> , <a href="#">RAD54</a> , <a href="#">RAD59</a> , <a href="#">RNH201</a> , <a href="#">RTT107</a> , <a href="#">SIN3</a> , <a href="#">STH1</a>                                                                                                                                                               | 21 of 191 genes, 10.99%    | 300 of 6436 annotated genes, 4.66% |
| <a href="#">chromatin organization</a> (GO:0006325)               | <a href="#">ABF1</a> , <a href="#">BDF2</a> , <a href="#">CDC28</a> , <a href="#">CLP1</a> , <a href="#">CTI6</a> , <a href="#">EAF7</a> , <a href="#">ESS1</a> , <a href="#">GIC1</a> , <a href="#">HTZ1</a> , <a href="#">LGE1</a> , <a href="#">RAD54</a> , <a href="#">SDS3</a> , <a href="#">SGF73</a> , <a href="#">SIN3</a> , <a href="#">SIR1</a> , <a href="#">SPT3</a> , <a href="#">SPT8</a> , <a href="#">STH1</a> , <a href="#">SWC5</a> , <a href="#">UTH1</a> , <a href="#">YCS4</a>                                                                                                                                                                        | 21 of 191 genes, 10.99%    | 310 of 6436 annotated genes, 4.82% |
| <a href="#">mitotic cell cycle</a> (GO:0000278)                   | <a href="#">ACT1</a> , <a href="#">APC4</a> , <a href="#">CDC10</a> , <a href="#">CDC15</a> , <a href="#">CDC20</a> , <a href="#">CDC25</a> , <a href="#">CDC28</a> , <a href="#">CDC34</a> , <a href="#">DAM1</a> , <a href="#">GIC1</a> , <a href="#">LTE1</a> , <a href="#">MOB1</a> , <a href="#">PEF1</a> , <a href="#">POL1</a> , <a href="#">PSE1</a> , <a href="#">SIC1</a> , <a href="#">SIN3</a> , <a href="#">SWI4</a> , <a href="#">TUB2</a> , <a href="#">YCS4</a>                                                                                                                                                                                            | 20 of 191 genes, 10.47%    | 373 of 6436 annotated genes, 5.80% |
| <a href="#">peptidyl-amino acid modification</a> (GO:0018193)     | <a href="#">ACT1</a> , <a href="#">APJ1</a> , <a href="#">CDC15</a> , <a href="#">CDC28</a> , <a href="#">CDC73</a> , <a href="#">CST9</a> , <a href="#">DBF2</a> , <a href="#">EAF7</a> , <a href="#">ESS1</a> , <a href="#">LIP5</a> , <a href="#">NSE4</a> , <a href="#">NSE5</a> , <a href="#">PSE1</a> , <a href="#">SGF73</a> , <a href="#">SMT3</a> , <a href="#">SPO16</a> , <a href="#">SPT3</a> , <a href="#">SPT8</a> , <a href="#">SWF1</a> , <a href="#">TDA1</a>                                                                                                                                                                                             | 20 of 191 genes, 10.47%    | 244 of 6436 annotated genes, 3.79% |
| <a href="#">cytoskeleton organization</a> (GO:0007010)            | <a href="#">ACT1</a> , <a href="#">BBP1</a> , <a href="#">CDC10</a> , <a href="#">CDC15</a> , <a href="#">CDC28</a> , <a href="#">CDC31</a> , <a href="#">CMD1</a> , <a href="#">CTF13</a> , <a href="#">DAM1</a> , <a href="#">EFB1</a> , <a href="#">ENT1</a> , <a href="#">ENT3</a> , <a href="#">GIC1</a> , <a href="#">NDC1</a> , <a href="#">SPC29</a> , <a href="#">STH1</a> , <a href="#">SWF1</a> , <a href="#">TUB2</a>                                                                                                                                                                                                                                          | 18 of 191 genes, 9.42%     | 272 of 6436 annotated genes, 4.23% |
| <a href="#">mitochondrion organization</a> (GO:0007005)           | <a href="#">ACT1</a> , <a href="#">ATG1</a> , <a href="#">ATG3</a> , <a href="#">COA4</a> , <a href="#">FCJ1</a> , <a href="#">MDM35</a> , <a href="#">PAM16</a> , <a href="#">PAM17</a> , <a href="#">PHB2</a> , <a href="#">PTC1</a> , <a href="#">QCR2</a> , <a href="#">RCF2</a> , <a href="#">SAM37</a> , <a href="#">TIM18</a> , <a href="#">TOM70</a> , <a href="#">UTH1</a> , <a href="#">YJR120W</a> , <a href="#">YME1</a>                                                                                                                                                                                                                                       | 18 of 191 genes, 9.42%     | 279 of 6436 annotated genes, 4.33% |

|                                                          |                                                                                                                                                                                                                                                                                                                                                                                                               |                           |                                          |
|----------------------------------------------------------|---------------------------------------------------------------------------------------------------------------------------------------------------------------------------------------------------------------------------------------------------------------------------------------------------------------------------------------------------------------------------------------------------------------|---------------------------|------------------------------------------|
| <a href="#">organelle fission</a><br>(GO:0048285)        | <a href="#">APC4</a> , <a href="#">CDC10</a> , <a href="#">CDC15</a> , <a href="#">CDC20</a> , <a href="#">CDC28</a> , <a href="#">CST9</a> , <a href="#">DAM1</a> , <a href="#">DBF2</a> , <a href="#">EBP2</a> , <a href="#">GIC1</a> ,<br><a href="#">LTE1</a> , <a href="#">MOB1</a> , <a href="#">PSE1</a> , <a href="#">RAD52</a> , <a href="#">SPO16</a> , <a href="#">TUB2</a> , <a href="#">YCS4</a> | 17 of 191<br>genes, 8.90% | 268 of 6436<br>annotated<br>genes, 4.16% |
| <a href="#">response to<br/>chemical</a><br>(GO:0042221) | <a href="#">ACT1</a> , <a href="#">ASK10</a> , <a href="#">GIM3</a> , <a href="#">GPR1</a> , <a href="#">IRA2</a> , <a href="#">MUP3</a> , <a href="#">PTC1</a> , <a href="#">SRB2</a> , <a href="#">TDA1</a> , <a href="#">TIM18</a> ,<br><a href="#">TMA19</a> , <a href="#">TUB2</a> , <a href="#">VPS27</a> , <a href="#">YJR084W</a> , <a href="#">YLR225C</a> , <a href="#">YOS9</a>                    | 16 of 191<br>genes, 8.38% | 567 of 6436<br>annotated<br>genes, 8.81% |

581



582 **Table 3. Gene Ontology (GO) Term enrichment of positive genetic interactors with *hrq1*.**

| GO Term (GO ID)                                                      | Genes Annotated to the GO Term                                                                                                                                                                                                                                                                                                                                                                                                                                               | GO Term Usage in Gene List | Genome Frequency of Use            |
|----------------------------------------------------------------------|------------------------------------------------------------------------------------------------------------------------------------------------------------------------------------------------------------------------------------------------------------------------------------------------------------------------------------------------------------------------------------------------------------------------------------------------------------------------------|----------------------------|------------------------------------|
| <a href="#">mitotic cell cycle</a><br>(GO:0000278)                   | <a href="#">ACT1</a> , <a href="#">APC11</a> , <a href="#">BRN1</a> , <a href="#">CDC48</a> , <a href="#">CDC6</a> , <a href="#">CLB3</a> , <a href="#">CSM1</a> , <a href="#">DPB11</a> , <a href="#">IPL1</a> , <a href="#">MCD1</a> , <a href="#">MPS1</a> , <a href="#">MPS3</a> , <a href="#">MYO2</a> , <a href="#">PDS5</a> , <a href="#">PFY1</a> , <a href="#">PSE1</a> , <a href="#">PSF1</a> , <a href="#">SMC4</a> , <a href="#">SPT6</a> , <a href="#">VRP1</a> | 20 of 151 genes, 13.25%    | 373 of 6436 annotated genes, 5.80% |
| <a href="#">cytoskeleton organization</a><br>(GO:0007010)            | <a href="#">ACT1</a> , <a href="#">AIM14</a> , <a href="#">ARP3</a> , <a href="#">CDC48</a> , <a href="#">CLB3</a> , <a href="#">ICE2</a> , <a href="#">IPL1</a> , <a href="#">LAS17</a> , <a href="#">MPS1</a> , <a href="#">MPS2</a> , <a href="#">MPS3</a> , <a href="#">MYO2</a> , <a href="#">NUM1</a> , <a href="#">PFY1</a> , <a href="#">RSP5</a> , <a href="#">SPC29</a> , <a href="#">STH1</a> , <a href="#">TSC11</a> , <a href="#">VRP1</a>                      | 19 of 151 genes, 12.58%    | 272 of 6436 annotated genes, 4.23% |
| <a href="#">regulation of organelle organization</a><br>(GO:0033043) | <a href="#">AIM14</a> , <a href="#">APC11</a> , <a href="#">ARP3</a> , <a href="#">CDC48</a> , <a href="#">CDC6</a> , <a href="#">CLB3</a> , <a href="#">IPL1</a> , <a href="#">LAS17</a> , <a href="#">MPS1</a> , <a href="#">PCP1</a> , <a href="#">PFY1</a> , <a href="#">PSE1</a> , <a href="#">RSP5</a> , <a href="#">SEC23</a> , <a href="#">SGV1</a> , <a href="#">SPT6</a> , <a href="#">TSC11</a> , <a href="#">VRP1</a>                                            | 18 of 151 genes, 11.92%    | 326 of 6436 annotated genes, 5.07% |
| <a href="#">lipid metabolic process</a><br>(GO:0006629)              | <a href="#">ALG14</a> , <a href="#">CDC1</a> , <a href="#">CHO2</a> , <a href="#">DGA1</a> , <a href="#">GAA1</a> , <a href="#">GPI10</a> , <a href="#">GPI12</a> , <a href="#">GPI2</a> , <a href="#">GWT1</a> , <a href="#">LCB1</a> , <a href="#">MGA2</a> , <a href="#">OPI3</a> , <a href="#">PHS1</a> , <a href="#">RSP5</a> , <a href="#">SAC1</a> , <a href="#">SUR1</a> , <a href="#">TSC11</a> , <a href="#">VPS4</a>                                              | 18 of 151 genes, 11.92%    | 347 of 6436 annotated genes, 5.39% |
| <a href="#">DNA repair</a><br>(GO:0006281)                           | <a href="#">ACT1</a> , <a href="#">ARP8</a> , <a href="#">CDC1</a> , <a href="#">DPB11</a> , <a href="#">IXR1</a> , <a href="#">MCD1</a> , <a href="#">NHP10</a> , <a href="#">PDS5</a> , <a href="#">POB3</a> , <a href="#">POL3</a> , <a href="#">PSF1</a> , <a href="#">RAD3</a> , <a href="#">RNH201</a> , <a href="#">RSC2</a> , <a href="#">SLX5</a> , <a href="#">SLX8</a> , <a href="#">STH1</a> , <a href="#">TEL1</a>                                              | 18 of 151 genes, 11.92%    | 300 of 6436 annotated genes, 4.66% |
| <a href="#">transcription by RNA polymerase II</a><br>(GO:0006366)   | <a href="#">CAM1</a> , <a href="#">CSE2</a> , <a href="#">IXR1</a> , <a href="#">MGA2</a> , <a href="#">MOT1</a> , <a href="#">NHP10</a> , <a href="#">PDC2</a> , <a href="#">POB3</a> , <a href="#">RAD3</a> , <a href="#">RGR1</a> , <a href="#">RSC2</a> , <a href="#">RSP5</a> , <a href="#">SGV1</a> , <a href="#">SPT6</a> , <a href="#">STH1</a>                                                                                                                      | 15 of 151 genes, 9.93%     | 536 of 6436 annotated genes, 8.33% |
| <a href="#">chromatin organization</a><br>(GO:0006325)               | <a href="#">ARP8</a> , <a href="#">CAC2</a> , <a href="#">CDC6</a> , <a href="#">IES1</a> , <a href="#">MGA2</a> , <a href="#">MPS3</a> , <a href="#">NHP10</a> , <a href="#">ORC6</a> , <a href="#">POB3</a> , <a href="#">RSC2</a> , <a href="#">RSP5</a> , <a href="#">SPT6</a> , <a href="#">STH1</a> , <a href="#">TEL1</a>                                                                                                                                             | 14 of 151 genes, 9.27%     | 310 of 6436 annotated genes, 4.82% |
| <a href="#">chromosome segregation</a><br>(GO:0007059)               | <a href="#">APC11</a> , <a href="#">BRN1</a> , <a href="#">CDC48</a> , <a href="#">CSM1</a> , <a href="#">IPL1</a> , <a href="#">MCD1</a> , <a href="#">MPS1</a> , <a href="#">MPS3</a> , <a href="#">PDS5</a> , <a href="#">RSC2</a> , <a href="#">SMC4</a> , <a href="#">SPC24</a> , <a href="#">STH1</a>                                                                                                                                                                  | 13 of 151 genes, 8.61%     | 210 of 6436 annotated genes, 3.26% |

|                                                   |                                                                                                                                                                                                                                                                                       |                        |                                    |
|---------------------------------------------------|---------------------------------------------------------------------------------------------------------------------------------------------------------------------------------------------------------------------------------------------------------------------------------------|------------------------|------------------------------------|
| <a href="#">organelle fission</a><br>(GO:0048285) | <a href="#">APC11</a> , <a href="#">BRN1</a> , <a href="#">CLB3</a> , <a href="#">CSM1</a> , <a href="#">IPL1</a> , <a href="#">MCD1</a> , <a href="#">MPS1</a> , <a href="#">MPS3</a> , <a href="#">NUM1</a> , <a href="#">PDS5</a> , <a href="#">PSE1</a> , <a href="#">SMC4</a>    | 12 of 151 genes, 7.95% | 268 of 6436 annotated genes, 4.16% |
| <a href="#">rRNA processing</a><br>(GO:0006364)   | <a href="#">BMS1</a> , <a href="#">FAL1</a> , <a href="#">MAK5</a> , <a href="#">MOT1</a> , <a href="#">MRM2</a> , <a href="#">POP4</a> , <a href="#">RPF2</a> , <a href="#">RPS23A</a> , <a href="#">RPS6B</a> , <a href="#">RPS9B</a> , <a href="#">RSP5</a> , <a href="#">SLX9</a> | 12 of 151 genes, 7.95% | 352 of 6436 annotated genes, 5.47% |

583

584 **Table 4. Gene Ontology (GO) Term enrichment of proteins that physically interact with Hrq1.**

| GO Term (GO ID)                                                    | Genes Annotated to the GO Term                                                                                                                                                                                                                                                                                                                                                                                                                                                                                                                                                                                                                                                                                                                                                                                                                                                                                       | GO Term Usage in Gene List | Genome Frequency of Use                  |
|--------------------------------------------------------------------|----------------------------------------------------------------------------------------------------------------------------------------------------------------------------------------------------------------------------------------------------------------------------------------------------------------------------------------------------------------------------------------------------------------------------------------------------------------------------------------------------------------------------------------------------------------------------------------------------------------------------------------------------------------------------------------------------------------------------------------------------------------------------------------------------------------------------------------------------------------------------------------------------------------------|----------------------------|------------------------------------------|
| <a href="#">rRNA processing</a><br>(GO:0006364)                    | <a href="#">BMS1</a> , <a href="#">BUD21</a> , <a href="#">CBF5</a> , <a href="#">CIC1</a> , <a href="#">DBP10</a> , <a href="#">DBP3</a> , <a href="#">DBP9</a> , <a href="#">DHR2</a> , <a href="#">DIP2</a> , <a href="#">ECM16</a> , <a href="#">ENP2</a> , <a href="#">ERB1</a> , <a href="#">ESF1</a> , <a href="#">FUN12</a> , <a href="#">GAR1</a> , <a href="#">KRE33</a> , <a href="#">MAK5</a> , <a href="#">MOT1</a> , <a href="#">MPP10</a> , <a href="#">MRD1</a> , <a href="#">NHP2</a> , <a href="#">NOP56</a> , <a href="#">NOP8</a> , <a href="#">NSA2</a> , <a href="#">NSR1</a> , <a href="#">NUG1</a> , <a href="#">RLP7</a> , <a href="#">ROK1</a> , <a href="#">RPL1A</a> , <a href="#">RPS6A</a> , <a href="#">RPS8A</a> , <a href="#">RRP12</a> , <a href="#">RRP8</a> , <a href="#">TSR1</a> , <a href="#">URB1</a> , <a href="#">UTP10</a> , <a href="#">UTP22</a> , <a href="#">UTP9</a> | 38 of 75 genes,<br>50.67%  | 352 of 6436<br>annotated<br>genes, 5.47% |
| <a href="#">ribosomal small subunit biogenesis</a><br>(GO:0042274) | <a href="#">BMS1</a> , <a href="#">BUD21</a> , <a href="#">DHR2</a> , <a href="#">DIP2</a> , <a href="#">ECM16</a> , <a href="#">ENP2</a> , <a href="#">FUN12</a> , <a href="#">KRE33</a> , <a href="#">MPP10</a> , <a href="#">MRD1</a> , <a href="#">NSR1</a> , <a href="#">ROK1</a> , <a href="#">RPS19A</a> , <a href="#">RPS6A</a> , <a href="#">RPS8A</a> , <a href="#">RRP12</a> , <a href="#">SGD1</a> , <a href="#">TSR1</a> , <a href="#">UTP10</a> , <a href="#">UTP22</a> , <a href="#">UTP9</a>                                                                                                                                                                                                                                                                                                                                                                                                         | 21 of 75 genes,<br>28.00%  | 149 of 6436<br>annotated<br>genes, 2.32% |
| <a href="#">ribosomal large subunit biogenesis</a><br>(GO:0042273) | <a href="#">CIC1</a> , <a href="#">DBP10</a> , <a href="#">DBP3</a> , <a href="#">DBP9</a> , <a href="#">ERB1</a> , <a href="#">MAK5</a> , <a href="#">NHP2</a> , <a href="#">NOC2</a> , <a href="#">NOP8</a> , <a href="#">NSA2</a> , <a href="#">NUG1</a> , <a href="#">RIX7</a> , <a href="#">RLP7</a> , <a href="#">RPL12A</a> , <a href="#">RPL1A</a> , <a href="#">RRP8</a> , <a href="#">SDA1</a> , <a href="#">URB1</a>                                                                                                                                                                                                                                                                                                                                                                                                                                                                                      | 18 of 75 genes,<br>24.00%  | 122 of 6436<br>annotated<br>genes, 1.90% |
| <a href="#">cytoplasmic translation</a><br>(GO:0002181)            | <a href="#">FUN12</a> , <a href="#">NIP1</a> , <a href="#">RPL12A</a> , <a href="#">RPL1A</a> , <a href="#">RPL23A</a> , <a href="#">RPL43A</a> , <a href="#">RPS19A</a> , <a href="#">RPS25B</a> , <a href="#">RPS6A</a> , <a href="#">RPS8A</a>                                                                                                                                                                                                                                                                                                                                                                                                                                                                                                                                                                                                                                                                    | 10 of 75 genes,<br>13.33%  | 201 of 6436<br>annotated<br>genes, 3.12% |
| <a href="#">transcription by RNA polymerase I</a><br>(GO:0006360)  | <a href="#">CDC73</a> , <a href="#">CTR9</a> , <a href="#">DHR2</a> , <a href="#">LEO1</a> , <a href="#">MOT1</a> , <a href="#">RPA49</a> , <a href="#">RPB5</a> , <a href="#">UTP10</a> , <a href="#">UTP9</a>                                                                                                                                                                                                                                                                                                                                                                                                                                                                                                                                                                                                                                                                                                      | 9 of 75 genes,<br>12.00%   | 69 of 6436<br>annotated<br>genes, 1.07%  |
| <a href="#">transcription by RNA polymerase II</a><br>(GO:0006366) | <a href="#">CDC73</a> , <a href="#">CTR9</a> , <a href="#">HHF1</a> , <a href="#">HTA1</a> , <a href="#">LEO1</a> , <a href="#">MOT1</a> , <a href="#">RPB5</a> , <a href="#">RTG3</a>                                                                                                                                                                                                                                                                                                                                                                                                                                                                                                                                                                                                                                                                                                                               | 8 of 75 genes,<br>10.67%   | 536 of 6436<br>annotated<br>genes, 8.33% |
| <a href="#">RNA modification</a><br>(GO:0009451)                   | <a href="#">AIR2</a> , <a href="#">CBF5</a> , <a href="#">GAR1</a> , <a href="#">KRE33</a> , <a href="#">NHP2</a> , <a href="#">NOP56</a> , <a href="#">PUS1</a> , <a href="#">RRP8</a>                                                                                                                                                                                                                                                                                                                                                                                                                                                                                                                                                                                                                                                                                                                              | 8 of 75 genes,<br>10.67%   | 177 of 6436<br>annotated<br>genes, 2.75% |
| <a href="#">DNA repair</a><br>(GO:0006281)                         | <a href="#">CDC73</a> , <a href="#">CTR9</a> , <a href="#">HTA1</a> , <a href="#">LEO1</a> , <a href="#">PDS5</a> , <a href="#">RFC3</a>                                                                                                                                                                                                                                                                                                                                                                                                                                                                                                                                                                                                                                                                                                                                                                             | 6 of 75 genes,<br>8.00%    | 300 of 6436<br>annotated<br>genes, 4.66% |

|                                                                  |                                                                                                                                          |                         |                                          |
|------------------------------------------------------------------|------------------------------------------------------------------------------------------------------------------------------------------|-------------------------|------------------------------------------|
| <a href="#">chromatin organization</a><br>(GO:0006325)           | <a href="#">CTR9</a> , <a href="#">FPR3</a> , <a href="#">FPR4</a> , <a href="#">HHF1</a> , <a href="#">HTA1</a> , <a href="#">LEO1</a>  | 6 of 75 genes,<br>8.00% | 310 of 6436<br>annotated<br>genes, 4.82% |
| <a href="#">peptidyl-amino acid modification</a><br>(GO:0018193) | <a href="#">CDC73</a> , <a href="#">CTR9</a> , <a href="#">FPR3</a> , <a href="#">FPR4</a> , <a href="#">HHF1</a> , <a href="#">LEO1</a> | 6 of 75 genes,<br>8.00% | 244 of 6436<br>annotated<br>genes, 3.79% |

585

586

FIGURES

**A** Negative genetic interactions 587

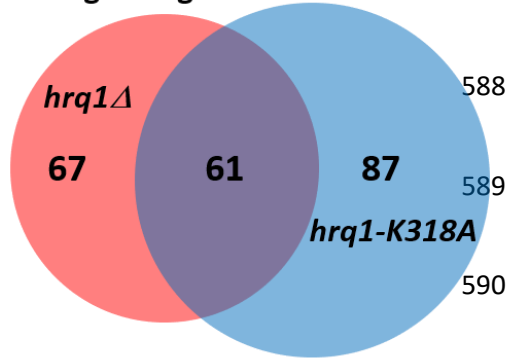

591

**B** Positive genetic interactions 592

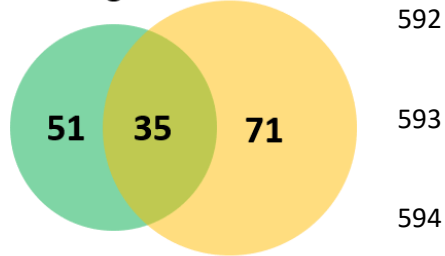

**C** Δ negatives vs. KA positives 595

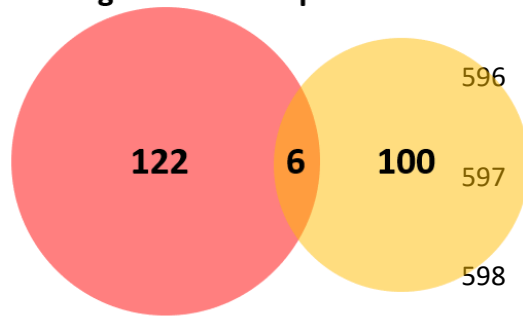

**D** Δ positives vs. KA negatives 599

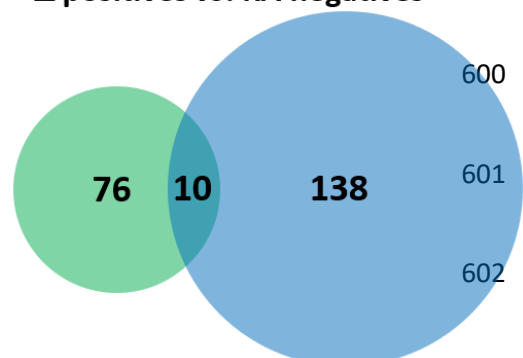

603 **Figure 1.** Venn diagrams of the shared synthetic genetic interactions displayed by *hrq1Δ* and  
604 *hrq1-K318A*. A) Sixty-one alleles negative interact with both the *hrq1Δ* and *hrq1-K318A*  
605 mutations. B) Similarly, 35 alleles positively interact with both the *hrq1Δ* and *hrq1-K318A*  
606 mutations. C) Very few of the negative genetic interactors with *hrq1Δ* are common to the set of  
607 positive *hrq1-K318A* interactors. D) Likewise, only 10 of the positive genetic interactors with  
608 *hrq1Δ* are shared by the set of negative *hrq1-K318A* interactors.

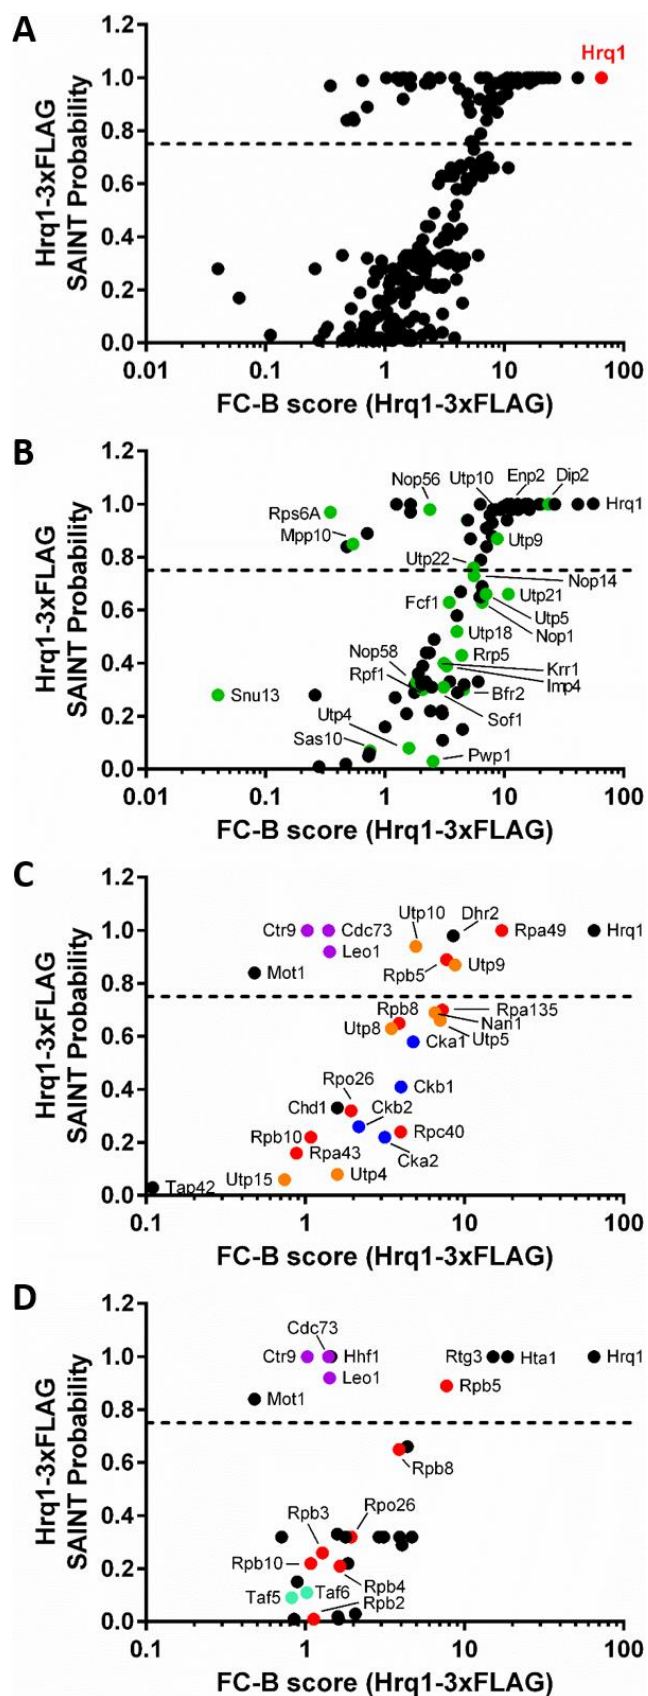

609

610 **Figure 2.** Identification of the Hrql-3xFLAG interactome by IP-MS and SAINT. A) Overview of the  
611 290 interactions identified by SAINT in anti-FLAG Hrql purifications. The graph compares the  
612 FC-B score against the SAINT probability score. The dashed line represents the 0.75 probability  
613 cut-off. The highest confidence hit, Hrql, is shown in red. Subsets of the 290 interactors  
614 enriched for rRNA processing and ribosomal small subunit biogenesis (B), transcription by RNA  
615 polymerase I (C), and transcription by RNA polymerase II (D) factors are also shown. Members  
616 of macromolecular complexes associated with these processes are labeled and color coded:  
617 small ribosomal subunit processome (<https://www.yeastgenome.org/complex/CPX-1604>),  
618 green; RNA polymerase I (<https://www.yeastgenome.org/complex/CPX-1664>), II  
619 (<https://www.yeastgenome.org/complex/CPX-2662>), and III  
620 (<https://www.yeastgenome.org/go/GO:0005666>), red; PAF1 complex  
621 (<https://www.yeastgenome.org/complex/CPX-1726>), purple; casein kinase 2  
622 (<https://www.yeastgenome.org/complex/CPX-581>), blue; UTP-A complex  
623 (<https://www.yeastgenome.org/complex/CPX-1409>), orange; and TFIID  
624 (<https://www.yeastgenome.org/complex/CPX-1642>), teal. All identifiers for these data are  
625 included in Table S6.



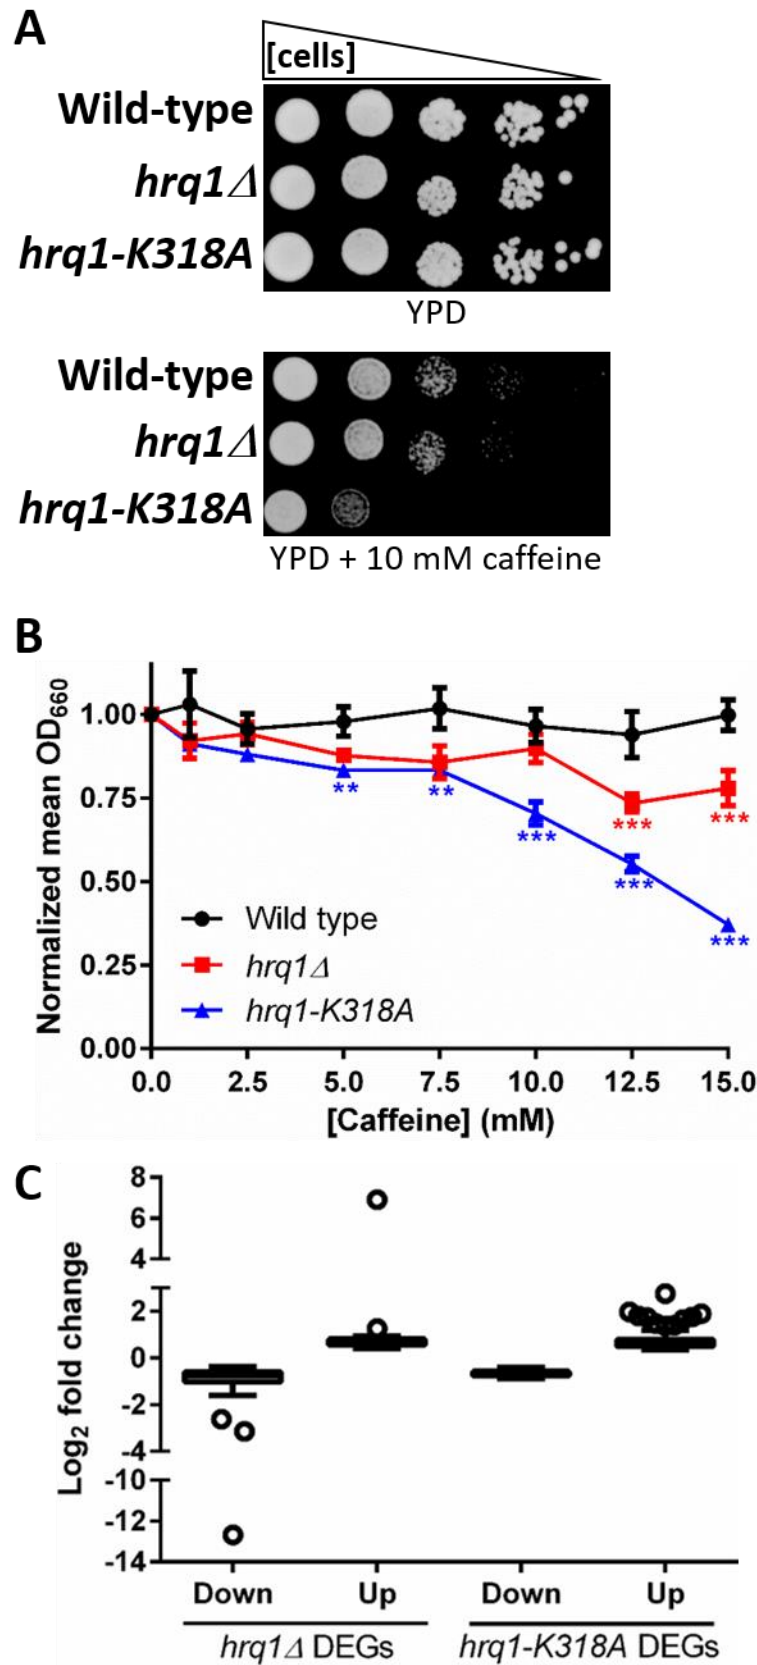

626

627 **Figure 3.** Mutation of *HRQ1* affects transcription. A) Tenfold serial dilutions of the indicated  
628 strains on rich medium (YPD) and YPD containing 10 mM caffeine. The *hrq1-K318A* cells are  
629 more sensitive to caffeine than the mild sensitivity displayed by the *hrq1Δ* mutant. B)  
630 Quantitative analysis of the effects of caffeine on the growth of *hrq1* cells. The normalized  
631 values were averaged from  $\geq 3$  independent experiments and compared to wild-type growth at  
632 the same caffeine concentration by one-way ANOVA. \*\*,  $p < 0.001$  and \*\*\*,  $p < 0.0001$ . As in  
633 (A), *hrq1Δ* cells display milder sensitivity to caffeine than *hrq1-k318A* cells. C) Analysis of the  
634 distribution of the magnitudes of expression changes of the DEGs. The  $\log_2$  fold change data for  
635 the significantly downregulated (Down) and upregulated (Up) DEGs in *hrq1Δ* and *hrq1-K318A*  
636 cells compared to wild-type cells are shown as box and whisker plots drawn using the Tukey  
637 method. The individually plotted points outside of the inner fences represent outliers (*i.e.*,  
638 expression changes with the largest absolute values) and correspond to genes whose  $\log_2$  fold  
639 change value is less than the value of the 25<sup>th</sup> quartile minus 1.5 times the inter-quartile  
640 distance (IQR) for downregulation or genes whose  $\log_2$  fold change value is greater than the  
641 value of the 75<sup>th</sup> quartile plus 1.5IQR for upregulation.

642

## SUPPLEMENTAL MATERIALS

643 **Table S1. Oligonucleotides used in this study.**

| Name   | Sequence (5'-3')                                                                                | Purpose                                                                     |
|--------|-------------------------------------------------------------------------------------------------|-----------------------------------------------------------------------------|
| MB525  | AAAACAGAACCGTTATACATATTGAGATGGTTAAGGTCGTAGAAAAGAAATGTTTCATTTG<br>AGAAGGAAAACGGATCCCCGGGTTAATTAA | Deleting <i>HRQ1</i> with NatMX                                             |
| MB526  | TCCACCAAGTGAATCTACAAGTAGTAGAATAGAGTATTTATATTCGGTTTACAACTACA<br>AATAGCGTGCGAATTCGAGCTCGTTTAAAC   | Deleting <i>HRQ1</i> with NatMX                                             |
| MB527  | GTGAATTGCTCAGAAGAGAAAGGCATACCGTC                                                                | PCR-amplifying <i>hrq1-K318A(NatMX)</i> and analyzing the <i>HRQ1</i> locus |
| MB528  | CTGTGCATCAACAAGGTGACAGAATGTTGATG                                                                | PCR-amplifying <i>hrq1-K318A(NatMX)</i> and analyzing the <i>HRQ1</i> locus |
| MB932  | CCGGAAGTATATCAGGGTATGGAACACG                                                                    | Sequencing <i>hrq1-K318A</i>                                                |
| MB1028 | TAAGATTATTGACGTTAGAAGAGCTACGAAAGACGATACTCATACAAATGAAATCATTA<br>AAAAGAGATAGGGGGAGGCGGGGGTGGGA    | Tagging Hrq1 with 3xFLAG                                                    |
| MB1029 | TCCACCAAGTGAATCTACAAGTAGTAGAATAGAGTATTTATATTCGGTTTACAACTACA<br>AATAGCGTGCGAATTCGAGCTCGTTTAAAC   | Tagging Hrq1 with 3xFLAG                                                    |

644

- 645 **Table S2.** Negative genetic interactions with *hrq1* $\Delta$  (see file S2).
- 646 **Table S3.** Positive genetic interactions with *hrq1* $\Delta$  (see file S2).
- 647 **Table S4.** Negative genetic interactions with *hrq1-K318A* (see file S2).
- 648 **Table S5.** Positive genetic interactions with *hrq1-K318A* (see file S2).
- 649 **Table S6.** Hrql-interacting proteins (see file S3).
- 650 **Table S7.** Gene expression levels in *hrq1* $\Delta$  and *hrq1-K318A* cells compared to wild-type (see file
- 651 S4).

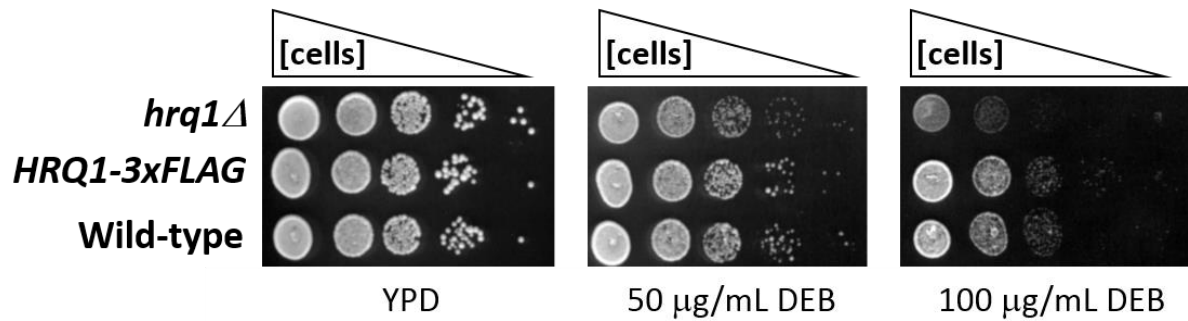

652

653 **Figure S1. The C-terminal 3xFLAG tag does not interfere with the role of Hrq1 in DNA inter-**  
654 **strand crosslink repair.** The indicated strains were grown overnight in YPD medium at 30°C with  
655 aeration, diluted to  $OD_{600} = 1$  in sterile  $H_2O$ , and then serially diluted 10-fold to  $10^{-4}$ . Five  
656 microliters of these dilutions were then spotted onto YPD agar plates and YPD agar plates  
657 supplemented with 50 or 100 μg/mL diepoxybutane (DEB). The plates were incubated at 30°C  
658 for 2 days before capturing images with a flatbed scanner and scoring growth.
